1 **Short title**

2 BNP is required for male gametogenesis

3

4 **Title**

5 The DC1 domain protein BINUCLEATE POLLEN is required for pollen  
6 development in Arabidopsis

7

8 **Author's names and affiliations**

9 Leonardo Agustín Arias<sup>1</sup>, Sebastián D'Ippolito<sup>1</sup>, Jéscica Frik<sup>1</sup>, Natalia Loreley  
10 Amigo, Claudia Anahí Casalongué, Gabriela Carolina Pagnussat, Diego  
11 Fernando Fiol<sup>2</sup>

12

13 Instituto de investigaciones Biológicas IIB-CONICET- Universidad Nacional de  
14 Mar del Plata, Mar del Plata, Buenos Aires, 7600, Argentina.

15

16 **Footnotes**

17 **Author contributions**

18 D.F.F. conceived the original screening and research plans; D.F.F., G.C.P. and  
19 C.A.C. supervised the experiments; L.A.A., S.D., J.F. and N.L.A. performed  
20 most of the experiments; D.F.F., G.C.P and L.A.A. designed the experiments  
21 and analyzed the data; D.F.F. conceived the project and wrote the article with  
22 contributions of all the authors; D.F.F. agrees to serve as the author responsible  
23 for contact and ensures communication.

24

25 <sup>1</sup> these authors contributed equally to this work.

26 <sup>2</sup> Author for contact: Diego Fernando Fiol ([diefiol@mdp.edu.ar](mailto:diefiol@mdp.edu.ar)) Tel +54  
27 2234753030

28

29

30 **One sentence summary**

31 The DC1 domain protein BNP is required for pollen development and  
32 germination by mediating NAC transcription factors VOZ1/2 nuclear localization.

33

## 34 **Abstract**

35 Development of the male gametophyte is a tightly regulated process that  
36 requires precise control of cell division and gene expression. A relevant aspect  
37 to understand the events underlying pollen development regulation constitutes  
38 the identification and characterization of the genes required for this process. In  
39 this work we showed that the DC1 domain protein BINUCLEATE POLLEN  
40 (BNP) is essential for pollen development and germination. Pollen grains  
41 carrying the defective *BNP* allele failed to complete mitosis II and are impaired  
42 in pollen germination. By yeast two hybrid screening and bimolecular  
43 fluorescence complementation assays, we identified a set of BNP-interacting  
44 proteins. Among confirmed interactors we found NAC family transcriptional  
45 regulators Vascular plant One-Zinc finger 1 (VOZ1) and VOZ2. BNP and  
46 VOZ1/2 proteins were mainly detected co-localized in prevacuolar  
47 compartments. As *voz1voz2* double mutants showed the same developmental  
48 defect observed in *bnp* pollen grains, we propose that BNP requirement to  
49 complete microgametogenesis could be linked to its interaction with VOZ1/2  
50 proteins. By studying VOZ1 localization in pollen from *bnp/BNP* plants, we  
51 showed that VOZ1 nuclear localization requires BNP. We propose that BNP is  
52 acting as a scaffold protein recruiting VOZ1 and likely VOZ2 to prevacuolar  
53 compartments into assemblies that could modulate VOZ1/2 translocation to the  
54 nucleus and therefore modulate their activity as transcriptional regulators.

55

56

## 57 **INTRODUCTION**

58 The development of the male gametophyte of flowering plants (pollen grain)  
59 takes place inside the anthers and involves two sequential phases:  
60 microsporogenesis and microgametogenesis. Microsporogenesis begins when  
61 a diploid microsporocyte undergoes meiotic division to form a tetrad of haploid  
62 microspores (Twell, 2011). During microgametogenesis a large vacuole is  
63 formed inside the released microspores and positions the nucleus in the  
64 periphery of the cell. This stage is followed by an asymmetric division or Pollen  
65 Mitosis I (PMI) that yields a large vegetative cell and a small germ cell. The  
66 germ cell is subsequently engulfed within the cytoplasm of the vegetative cell.

67 The germ cell then undergoes a second division, Pollen Mitosis II (PMII), which  
68 results in twin sperm cells and yields the mature tricellular pollen. In species  
69 such as *Arabidopsis thaliana*, PMII takes place inside the pollen grain prior to  
70 anthesis. Although transcriptional studies have provide significant advances in  
71 the understanding of the molecular mechanisms controlling male gametophyte  
72 development, the picture is still far from complete (reviewed in (Hafidh et al.,  
73 2016). Studies on isolated mutants have also proved to be of great importance  
74 to identify novel genes and cellular mechanisms involved in this process (Borg  
75 et al., 2009).

76 Divergent C1 (DC1) domains are cysteine/histidine-rich zinc finger  
77 modules found exclusively in the plant Kingdom. DC1 domains resemble the C1  
78 domains present in PKC and in over a dozen of animal proteins (Colon-  
79 Gonzalez and Kazanietz, 2006). However, C1 domains are not frequent in  
80 plants, as they were only identified in diacylglycerol kinases (Escobar-  
81 Sepúlveda et al., 2017). C1 domains have the ability to bind the secondary  
82 messenger diacylglycerol (DAG) but also participate in protein-protein  
83 interactions and in the targeting of proteins to the membrane (Colon-Gonzalez  
84 and Kazanietz, 2006). Sequence and structure similarities between DC1 and C1  
85 domains suggest that some of the roles played by C1 domains in animal  
86 proteins could be fulfilled in plants by DC1 domains (D'Ippólito et al., 2017).

87 The *Arabidopsis* genome encodes for over 140 uncharacterized proteins  
88 harboring DC1 domains. Reports regarding genes coding for DC1 domain  
89 proteins were limited to transcriptional responses. In *Arabidopsis*, *At5g17960*  
90 was described as responsive to hormones and stress treatments (Bhaskar et  
91 al., 2015) and *ULI3 (At5g59920)* was related to UV-B responses (Suesslin and  
92 Frohnmeyer, 2003). In other plant species, DC1 domain proteins have been  
93 also associated with stress and hormone responses (Shinya et al., 2007; Li et  
94 al., 2010; Hwang et al., 2014; Gao et al., 2016).

95 The first functional characterization of a DC1 domain protein,  
96 Vacuoleless Gametophytes (VLG), was recently reported (D'Ippólito et al.,  
97 2017). VLG localizes to prevacuolar compartments and it was proved to be  
98 essential for the development of the female and male gametophytes. A role for  
99 VLG was proposed during vacuole biogenesis, likely through the interaction with

100 the VAMP protein PVA12 and the GDSL-motif lipase LTL1 (D'Ippólito et al.,  
101 2017).

102 In this work we identified the DC1 domain protein BINUCLEATE  
103 POLLEN (BNP) as an essential protein for male gametophyte development in  
104 Arabidopsis. In addition, we demonstrated that BNP is required for pollen  
105 germination and early sporophytic developmental stages. To functionally  
106 characterize BNP we searched for protein interactors and identified  
107 transcriptional regulators VOZ1 and VOZ2 as BNP binding proteins.  
108 Furthermore, we showed that VOZ proteins co-localize to BNP, supporting a  
109 physiological interaction. As *voz1voz2* mutants also exhibit pollen  
110 developmental defects (Celesnik et al., 2013), we propose that the interaction  
111 between BNP and VOZ proteins outside the nucleus might impact on VOZ1/2  
112 activities, resulting in functional consequences for gene expression. By studying  
113 VOZ1 localization in a *bnp* mutant background, we showed that VOZ1 nuclear  
114 localization requires BNP. Thus, BNP could act as a scaffold protein recruiting  
115 VOZ1/2 and likely other proteins to prevacuolar compartments into assemblies  
116 that might modulate VOZ1/2 translocation to the nucleus and therefore their  
117 activity as transcriptional regulators.

118

119

## 120 RESULTS

### 121 BNP codes for a DC1 domain containing protein

122 *At2g44370*, here named *BINUCLEATE POLLEN (BNP)*, is a single exon gene  
123 that encodes for a 250-amino acid long protein with three DC1 domains (Fig.  
124 1B). Phylogenetic analysis of Arabidopsis DC1 domain protein family grouped  
125 BNP into the most divergent cluster, being VLG its closest homolog (Fig. 1C).  
126 Multiple sequence alignments of selected protein sequences of this cluster and  
127 DC1 domain proteins from *C. annuum*, tobacco, wheat and cotton showed  
128 amino acid conservation mostly restricted to the residues that define the DC1  
129 signature motif, which might be involved in Zn<sup>2</sup> coordination and folding of the  
130 domain (Fig. 1D). On the other hand, amino acids corresponding to loop regions  
131 in the folded domain -which might define its binding capabilities (Rahman and  
132 Das, 2015)- showed very low similarity, suggesting a diversity of interactors for  
133 the aligned proteins.

134

### 135 *bnp* is a gametophytic mutation

136 Two Arabidopsis lines with T-DNA insertions in *BNP* (SALK\_114889 -here  
137 named *bnp-1* and GK-008E01 -here named *bnp-2*) were studied (Fig. 1A). After  
138 backcrossing to the Col-0 ecotype, the progeny of self-crossed plants was  
139 genotyped. No homozygous mutant plants were recovered in the offspring from  
140 *bnp-1/BNP* or *bnp-2/BNP* self-pollinated plants. The ratio of hemizygous to WT  
141 plants in the progeny of self-fertilized *bnp-1/BNP* plants was 1.44 ( $n = 183$ ). For  
142 *bnp-2/BNP* plants, segregation analysis for sulfadiazine resistance showed a  
143 ratio of resistant to sensitive plants of 1.31 ( $n = 2634$ ). The proportion of plants  
144 harboring the transgene recovered in the progeny of self-fertilized plants was  
145 lower than the Mendelian segregation ratio expected for diploid sporophytic  
146 (3:1) or embryo lethal (2:1) mutants suggesting a gametophytic defect.  
147 Furthermore, no obvious sporophytic phenotypes were observed in the  
148 hemizygous plants, suggesting that *bnp* is a recessive mutation (Fig. S1). The  
149 siliques of *bnp/BNP* plants showed a small percentage of aborted seeds, not  
150 different to WT plants (Fig. S1).

151 As no homozygous plants were recovered and siliques from hemizygous  
152 plants looked normal, the *BNP* mutation could be affecting pollen development  
153 or germination. To test this hypothesis, we performed reciprocal crosses

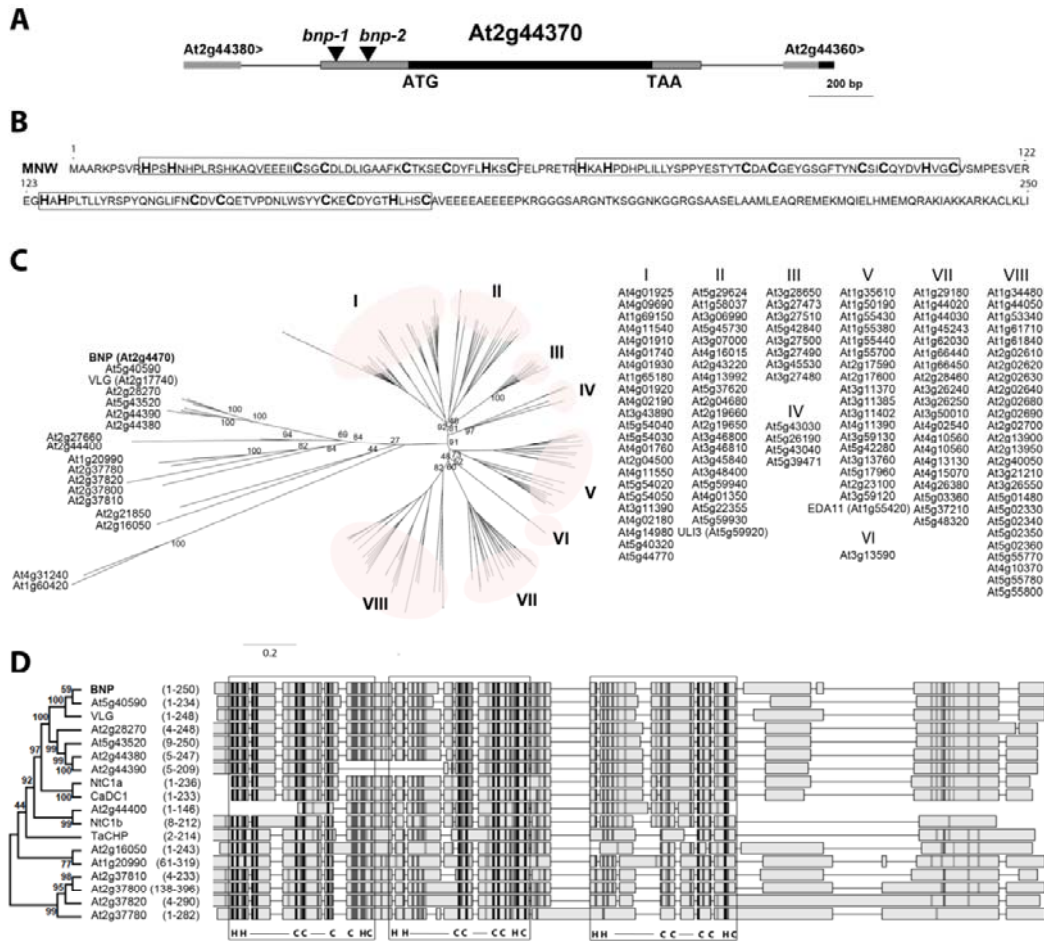

**Figure 1. *BNP* codes for a DC1 domain containing protein.** (A) Schematic view of a region of Arabidopsis chromosome 2 (from 18,323,538 to 18,321,537 bp -TAIR10) showing *BNP* genomic location and *bnp-1* and *bnp-2* insertion sites. (B) *BNP* amino acid sequence with boxed DC1 domains. (C) Phylogenetic tree of 140 DC1 domain containing proteins in Arabidopsis. Bootstrap test results (1000 replicates) of the major nodes are indicated. IDs of sequences grouped in clusters I to VIII are listed. (D) Alignment of *BNP* with its closest Arabidopsis homologs and CaDC1 (AEI52549), TaChP (ACU80555), NtDC1a (BAF80452) and NtDC1b (BAF80453). Phylogenetic tree with bootstrap test results (1000 replicates) for the alignment of the complete 18 sequences is shown. Amino acid region represented for each sequence is indicated. DC1 domains are framed, signature residues and binding loop regions are indicated (C=Cys, H=His, — = loop). Higher intensity in grey scale denotes higher sequence similarity.

154 between *bnp/BNP* and WT plants and calculated the transmission efficiency of  
 155 the mutant allele (TE = resistant/WT offspring x 100) (Table 1). Only 15.5% of  
 156 microgametophytes carrying *bnp-1* and 22.0 % of the microgametophytes  
 157 carrying *bnp-2* transmitted the insertion to the next generation ( $p < 0.0001$ , Chi  
 158 square test), indicating that *bnp* affects male gametophyte development or  
 159 function (Table 1). No significant defects were observed for transmission  
 160 through the female gametophyte (90.8% and 95.9% for *bnp-1* and *bnp-2*,  
 161 respectively, table 1, p-values 0.51 and 0.66 respectively, Chi-square test).



162 Although the insertions in *BNP* compromised the transmission of the  
163 mutation through the male gametophyte, a fraction (about 15-22%) of pollen  
164 grains might still be able to transmit the insertion to the next generation.  
165 However, we did not recover homozygous mutant plants in the self-progeny of  
166 hemizygous plants. Thus, we investigated whether embryogenesis or  
167 germination were affected by the mutation analyzing pistils and seeds from  
168 *bnp/BNP* plants. No obvious embryo defects were observed in siliques from  
169 *bnp/BNP* plants, as neither developing siliques nor seed sets showed  
170 differences from WT siliques (Fig. S1). However, seeds from *bnp/BNP* self-  
171 pollinated plants showed reduced germination rates when compared to WT  
172 plants (94.8% for *bnp-1/BNP* ( $n = 754$ ), 93.3% for *bnp-2/BNP* ( $n = 973$ ) and  
173 98.9% for WT ( $n = 440$ )). Further analysis of the germinated seeds showed that  
174 a fraction of the seedlings arrested soon after germination. Values of seedling  
175 lethality obtained were of 0.9% for WT ( $n = 440$ ), 3.4% ( $n = 754$ ) for seeds from  
176 *bnp-1/BNP* self-pollinated plants and 4.5% ( $n = 973$ ) for *bnp-2/BNP* self-  
177 pollinated plants (Table 2). PCR genotyping of arrested seedlings showed that  
178 75% ( $n = 12$ ) corresponded to *bnp/bnp* homozygous individuals.

179 Altogether these results suggest that the mutation might cause  
180 impairment in male gametogenesis or function, reduced seed germination and  
181 seedling lethality, which combined, explain the absence of homozygous mutant  
182 plants in the progeny of selfed hemizygous plants.

183

#### 184 **Pollen development in *bnp* mutants is arrested at the binuclear stage**

185 Viability of mature pollen was analyzed in *bnp-1* and *bnp-2* by means of  
186 Alexander staining and FDA staining. No differences were observed compared  
187 to pollen obtained from WT plants, indicating that the *bnp* mutation does not  
188 affect pollen viability (Fig. S2).

189 We later analyzed nuclear composition of mature pollen using DAPI  
190 staining. Normal mature pollen contains three nuclei: a vegetative nucleus and  
191 two sperm nuclei generated by the mitotic division of the generative nucleus.  
192 Mature pollen from WT plants showed 99.2% ( $n = 772$ ) of trinucleate grains. On  
193 the other hand, *bnp/BNP* plants presented only about 57-59% of trinucleate  
194 mature pollen grains (56.9% ( $n = 1123$ ) in *bnp-1/BNP* and 59.0% ( $n = 981$ ) in

195 *bnp-2/BNP*). The rest were found in a binucleate stage, suggesting  
196 developmental arrest.

197 A genetic complementation assay confirmed that the insertions in *BNP*  
198 are causing the abnormalities observed during pollen development. *bnp-1/BNP*  
199 hemizygous plants transformed with a *ProBNP:BNP:GFP* translational fusion  
200 construct showed trinucleate mature pollen grains at similar levels of WT plants  
201 (Fig. S3). This result was recorded in T3 plants of five independent  
202 complemented lines.

203 In order to better characterize the defect observed during pollen  
204 development, *bnp-1/BNP* plants were crossed to *qrt1* homozygous plants,  
205 which are impaired in a pectin methyl esterase responsible for the separation of  
206 microspores tetrads (Francis et al., 2006). F2 plants that carried the insertion in  
207 *BNP* in hemizygosis and were homozygous for *qrt1* (*bnp/BNP qrt1/qrt1*) were  
208 further analyzed. Mature tetrads were collected and stained with DAPI.  
209 Consistently with our previous results, most tetrads of *bnp-1/BNP qrt1/qrt1*  
210 plants showed an abnormal number of nuclei (Fig. 2A), indicating a failure to  
211 complete PMII in about 46% of the pollen grains analyzed.

212 We next assessed germination of pollen grains in the tetrads. As shown  
213 in Fig. 2, germination rates were 37.7% in pollen collected from *bnp-1/BNP*  
214 *qrt1/qrt1* plants and 68.2% in pollen grains from *BNP/BNP qrt1/qrt1* plants (Fig.  
215 2F). This indicates a reduction of 44.7% in the germination rate in pollen from  
216 *bnp-1/BNP qrt1/qrt1* plants compared to pollen grain tetrads from *BNP/BNP*  
217 *qrt1/qrt1* plants. As the reduction in the rate of germination observed in the  
218 hemizygous background *bnp-1/BNP* was less than 50%, this suggests that  
219 although severely affected, a small fraction of *bnp* pollen grains is still able to  
220 germinate.

221 Analysis of pollen grain germination in *bnp-2/BNP* plants showed  
222 comparable values, as we calculated a decrease in germination rate of about  
223 36% compared to pollen grains from WT plants. Germination rates of 43% ( $n =$   
224 787) and 67% ( $n = 443$ ) were recorded for pollen grains collected from *bnp-*  
225 *2/BNP* and WT plants respectively.



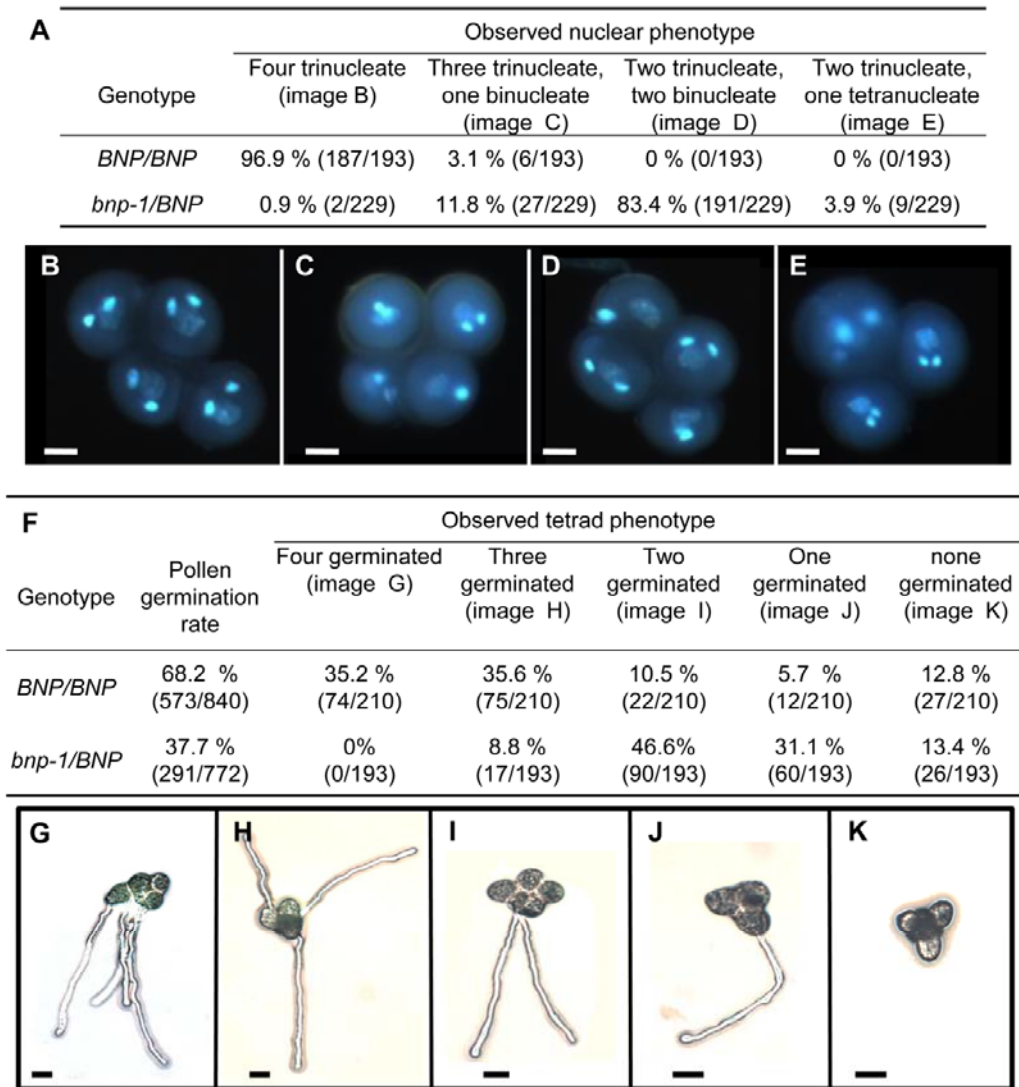

**Figure 2. Pollen development and germination is impaired in *bnp-1* mutants.** (A) Quantification of phenotypes observed in *BNP/BNP* and *bnp-1/BNP* plants in *qrt1/qrt1* background. (B-E) Nuclear configuration types revealed by DAPI (4',6-Diamidino-2-phenylindole) staining. Bars = 10  $\mu$ m (F) Quantification of pollen tube germination in tetrads from *BNP/BNP* and *bnp-1/BNP* plants in *qrt1/qrt1* background. (G-K) Types of pollen tube germination in tetrads. Bars = 20  $\mu$ m.

226 These results showed that *BNP* is required to complete pollen  
 227 development, specifically to undergo PMII. Arrested pollen grains were viable,  
 228 but germination was impaired, which explains the reduced transmission of *bnp*  
 229 through the male gametophyte (Table 1).

230

231 ***BNP* is expressed in pollen and young sporophytic tissues**

232 Expression of *BNP* was studied in Arabidopsis plants expressing the *BNP-GFP*  
233 fusion driven by the *BNP* promoter, which was proved to be functional, as it  
234 complemented the phenotype in *bnp/BNP* plants (Fig. S3). *BNP-GFP* was  
235 detected in cytoplasmic speckles following a punctuate pattern at early stages  
236 of pollen development (microspore tetrad and released microspore) and in  
237 discrete bigger compartments at bicellular and tricellular stages (Fig. 3A and  
238 3H). The same expression pattern was observed in the pollen tube (PT) of  
239 germinating pollen grains (Fig. 3I-J).

240 To gain further knowledge of *BNP* roles *in planta*, a reporter construction  
241 expressing the *GUS* gene under the control of *BNP* promoter was used to  
242 analyze *BNP* expression. *GUS* activity accumulated at early stages of seedling  
243 development, mainly in vascular tissues and developing leaves. It was also  
244 observed associated to anthers at very early stages of floral development,  
245 indicating that expression of *BNP* can be detected before meiosis (Fig. 3K-S).  
246 Expression data observed were comparable to transcriptional data available in  
247 the efp Browser Data Analysis Tool (<https://bar.utoronto.ca/eplant/>) (Fig. S4).  
248 These results also indicated that *BNP* could be functional not only during pollen  
249 development but also at additional developmental stages, such as  
250 sporogenesis, germination and early stages of sporophyte development.

251

252 ***BNP* interacts with transcription factors VOZ1 and VOZ2**

253 To gain insight into possible functions of *BNP* we carried out a yeast-two-hybrid  
254 screening to identify potential *BNP* protein interactors. Two closely related NAC  
255 family transcription factors, *VOZ1* and *VOZ2*, were identified among interactors  
256 (a selection of the identified clones is presented in Table S1). Interestingly,  
257 *VOZ1* and *VOZ2* were reported to bind a pollen-specific promoter element  
258 (Mitsuda et al., 2004). *BNP* was also retrieved in the Y2H screening as a self-  
259 interactor (Table S1). To confirm *BNP-VOZ1*, *BNP-VOZ2* and *BNP-BNP*  
260 interactions, we performed Bimolecular Fluorescence complementation (BiFC)  
261 assays.

262 We made constructs to express *BNP* and each of the candidate proteins  
263 fused either to the N- or the C-terminal of yellow fluorescent protein (YFP)  
264 fragments to generate *BNP-N-YFP* and *VOZ1-C-YFP*, *VOZ2-C-YFP* or *BNP-C-*

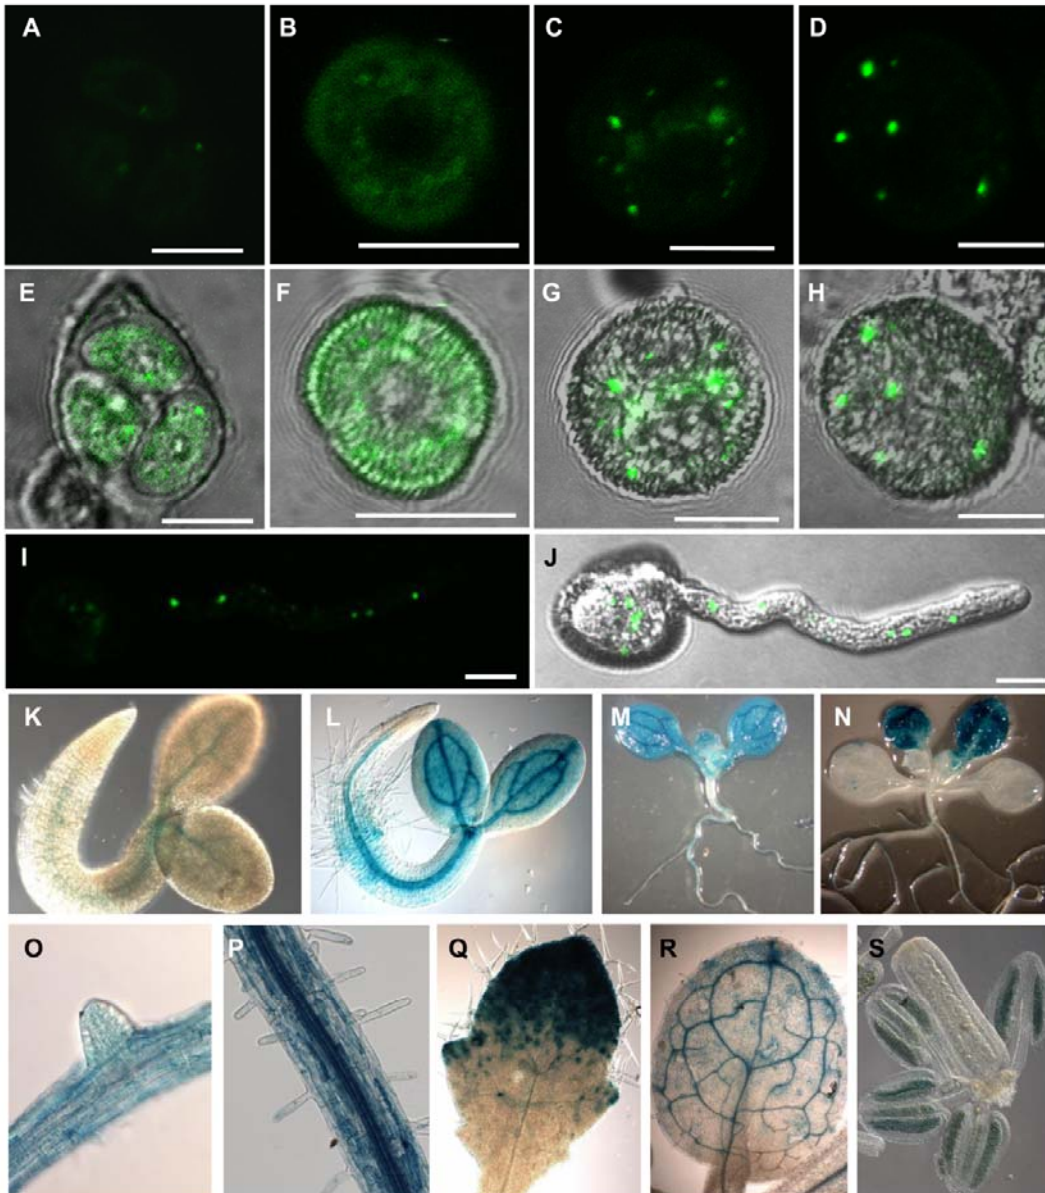

**Figure 3. BNP is expressed in pollen and young sporophytic tissues.** (A-D) Confocal images showing BNP-GFP through microgametogenesis. (E-H) Overlay between DIC and GFP fluorescence. (A and E) Microspore tetrad, (B and F) released microspore, (C and G) bicellular stage and (D and H) tricellular stage. (I) Image showing a projection along the z axis of all planes showing GFP fluorescence. (J) overlay of DIC and GFP fluorescence showing a germinating pollen grain. (K-S) GUS activity in Arabidopsis transgenic plants carrying the *pBNP:GUS* construct. (K) Seedling 24 h after imbibition, (L) 48 h after imbibition, (M) 6 days post germination and (N) 12 days post germination. (O) Root with lateral root primordium, (P) primary root with root hairs, (Q) third leaf 8 days after imbibition (R) third leaf 14 days after imbibition. (S) GUS signal was detected inside anthers at floral developmental stage 10. Three independent transgenic lines were used for this study. Pictures are representative of the results obtained in all analyzed lines. Bars = 10  $\mu$ m.

265 YFP fusion constructs. The fusion constructs under control of the CaMV 35S  
266 promoter were used to transiently transform *N. benthamiana* leaves and BiFC  
267 signals were analyzed using confocal microscopy (Fig. 4). YFP was detected  
268 following a punctate pattern indicating BNP interaction with VOZ1, VOZ2 and  
269 with itself (Fig. 4). Control *N. benthamiana* leaves transfected either with BNP-



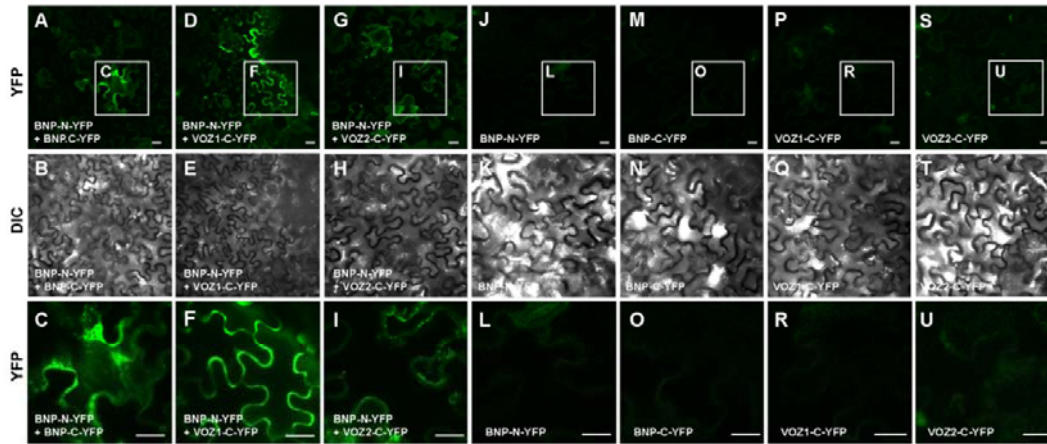

**Figure 4. BNP interacts with itself, VOZ1 and VOZ2.** Bimolecular fluorescence complementation (BiFC) analysis of the interaction of BNP with itself, VOZ1 and VOZ2 in *Nicotiana benthamiana* leaves. Representative confocal microscopy images showing that BNP interacts with (A–C) itself, (D–F) VOZ1 and (G–I) VOZ2. Reconstituted YFP fluorescence (YFP) or DIC images of *N. benthamiana* leaves are shown in epidermal cells co-infiltrated with *Agrobacterium tumefaciens* harboring the indicated constructs. Control *N. benthamiana* leaves transfected with (J–L) BNP-N-YFP, (M–O) BNP-C-YFP, (P–R) VOZ1-C-YFP, (S–U) VOZ2-C-YFP do not show any BiFC signal. The last row (C, F, I, L, O, R, U) correspond to the magnification of regions of interest (insets) indicated in the first row. Bars = 20  $\mu$ m.

270 N-YFP, VOZ1-C-YFP, VOZ2-C-YFP or BNP-C-YFP did not show any BiFC  
 271 signal (Fig. 4). An additional control experiment using VLG (as BNP closest  
 272 homolog, sharing 72.0% identity) showed negative results with VOZ1, VOZ2  
 273 and BNP indicating the specificity of the observed interactions (Fig. S5).

274

275 **BNP mainly localizes to prevacuolar compartments and co-localizes with**  
 276 **VOZ1 and VOZ2**

277 We used the lipophilic dye FM4-64 to gain insight on the subcellular localization  
 278 of BNP. After internalization, this dye is sequentially distributed to different  
 279 organelle membranes, following the endocytic pathway (Bolte et al., 2004). We  
 280 followed FM4-64 in roots of plants expressing the fusion protein BNP-GFP at  
 281 different time points. We observed no co-localization of internalized FM4-64 and  
 282 BNP-GFP after 30 min to 2 h of incubation (Fig. S6), discarding localization of  
 283 BNP-GFP to early endosomes or to components of the *trans*-Golgi Network. In  
 284 agreement with that, BNP-GFP did not co-localize with Brefeldin bodies caused  
 285 by the addition of the endosomal recycling inhibitor Brefeldin A to FM4-64  
 286 treated roots (Fig. S6).

287 To assess BNP localization, we used *N. benthamiana* to transiently  
 288 express BNP-GFP together with a prevacuolar compartments marker, the Rab5  
 289 GTPase Rha1 fused to RFP (Foresti et al., 2010) or with a Golgi apparatus

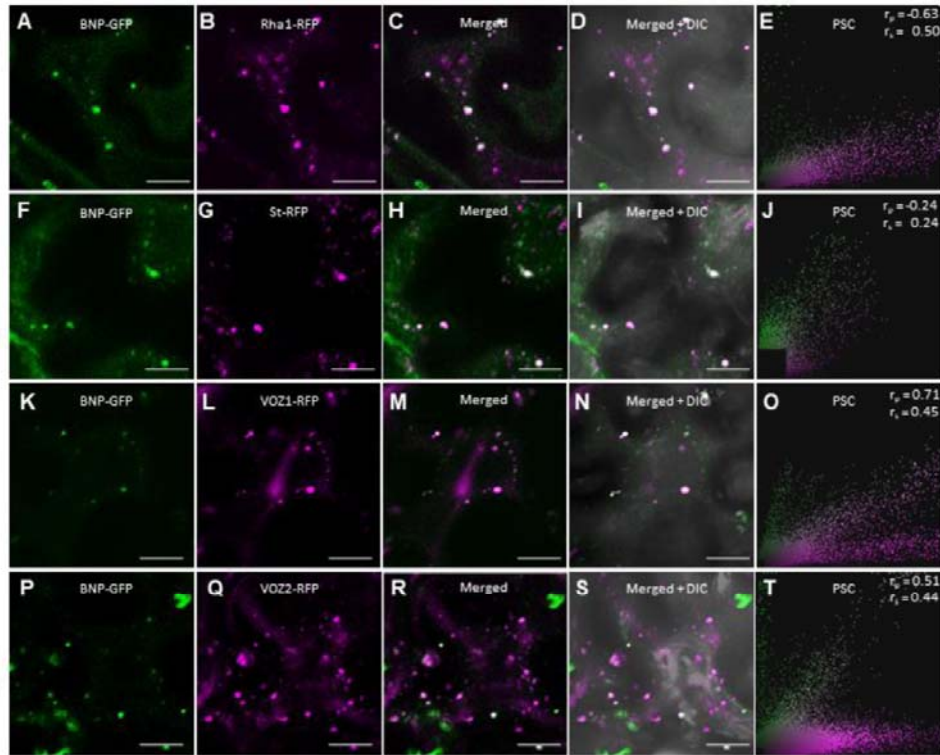

**Figure 5. BNP co-localizes with VOZ1 and VOZ2 to prevacuolar compartments.** (A, F, K and P) Localization of BNP-GFP transiently expressed in *Nicotiana benthamiana* epidermal cells. (B) Fluorescent marker for prevacuolar compartments, RFP-Rha1. (C) Merged image of BNP-GFP and RFP-Rha1. (D) Shows an overlay with the corresponding bright-field image. (E, J, O and T) Pearson and Spearman correlation (PSC) test calculated using a plugin for ImageJ;  $r$  values indicate the level of co-localization ranging from +1 for perfect co-localization to -1 for negative correlation. (G) Fluorescent marker for Golgi apparatus, St-RFP. (H) Merged image of BNP-GFP and St-RFP. (I) Shows an overlay with the corresponding bright-field image. (L) Localization of RFP-VOZ1. (M) Merged image of BNP-GFP and RFP-VOZ1. (N) Shows the corresponding bright field image of the cells showed in (M). (Q) Localization of RFP-VOZ2. (R) Merged image of BNP-GFP and RFP-VOZ2. (S) Bright field image of the cells showed in (R). Bars = 20  $\mu$ m.

290 marker, the rat sialyltransferase St fused to RFP (Wee et al., 1998).  
291 Representative images shown in Fig. 5 and Pearson and Spearman correlation  
292 (PSC) values indicated that BNP-GFP co-localized with Rha1-RFP (Fig. 5A-E)  
293 and did not co-localize with St-RFP (Fig. 5F-J), suggesting that BNP is mainly  
294 confined to prevacuolar compartments associated vesicles.

295 To further confirm that BNP and VOZ proteins are indeed localized in the  
296 same subcellular compartment, we performed a co-localization study. *N.*  
297 *benthamiana* plants were transiently co-transfected with constructions to  
298 express BNP-GFP and either VOZ1-RFP or VOZ2-RFP. In these transfected  
299 cells, a typical punctuate expression was detected for BNP-GFP and high levels

300 of co-localization were observed with both, VOZ1-RFP and VOZ2-RFP (Fig. 5K-  
301 T).

302

### 303 **BNP is required for nuclear localization of VOZ1 in pollen**

304 Since VOZ1 and VOZ2 do not contain neither a transmembrane region nor  
305 signals that can predict their subcellular confinement, we analyzed a possible  
306 role for BNP on VOZ protein localization in pollen from WT and *bnp* plants.

307 To test this, we transformed *BNP/BNP* and hemizygous *bnp-1/BNP*  
308 plants, both in the *qrt1* background, with *ProUb10:VOZ1-RFP* and analyzed  
309 VOZ1-RFP intracellular localization during pollen development (Fig. 6). The  
310 introduction of the mutation in the *qrt1* background allows to compare and  
311 analyze any difference in VOZ1 localization that might arise from an impairment  
312 in BNP, as pollen tetrads of the *bnp-1/BNP* genotype are constituted by two  
313 mutant (binucleate) and two WT (trinucleate) pollen cells.

314 At earlier developmental stages (microspore and bicellular pollen) VOZ1  
315 was detected at the cytoplasm with very low signal intensities, showing no  
316 differences between *qrt1/qrt1*, *BNP/BNP*, *VOZ1-RFP* and *qrt1/qrt1*, *bnp-1/BNP*,  
317 *VOZ1-RFP* genotypes. (Fig. 6A-H). In mature WT pollen, however, VOZ1-RFP  
318 was detected at higher levels and its localization appeared distributed between  
319 the cytoplasm and the nuclei. Most of the pollen tetrads (91.5%) from *qrt1/qrt1*,  
320 *BNP/BNP*, *VOZ1-RFP* plants presented VOZ1 nuclear localization in the four  
321 cells of the tetrad (Fig. 6M). However, most of the tetrads from the *qrt1/qrt1*,  
322 *bnp-1/BNP*, *VOZ1-RFP* genotype presented VOZ1 nuclear localization only in  
323 one or two pollen cells (85.2%, Fig. 6M).

324 Next, we analyzed if the lack of a functional BNP could also affect the  
325 levels of VOZ1 in pollen. We quantified VOZ1-RFP by measuring red  
326 fluorescence intensity in mature pollen cells of *qrt1/qrt1*, *bnp-2/BNP*, *VOZ1-RFP*  
327 and *qrt1/qrt1*, *bnp-2/BNP*, *VOZ1-RFP* plants (Fig. S9). Interestingly, lower red  
328 fluorescence levels were recorded in *qrt1/qrt1*, *bnp-2/BNP*, *VOZ1-RFP* plants  
329 suggesting that BNP could have a role in the promotion of VOZ1 stabilization.

330

331 Altogether, these results strongly suggest that BNP is involved in VOZ1  
332 localization, as its nuclear localization relies on the presence of a functional  
333 BNP.



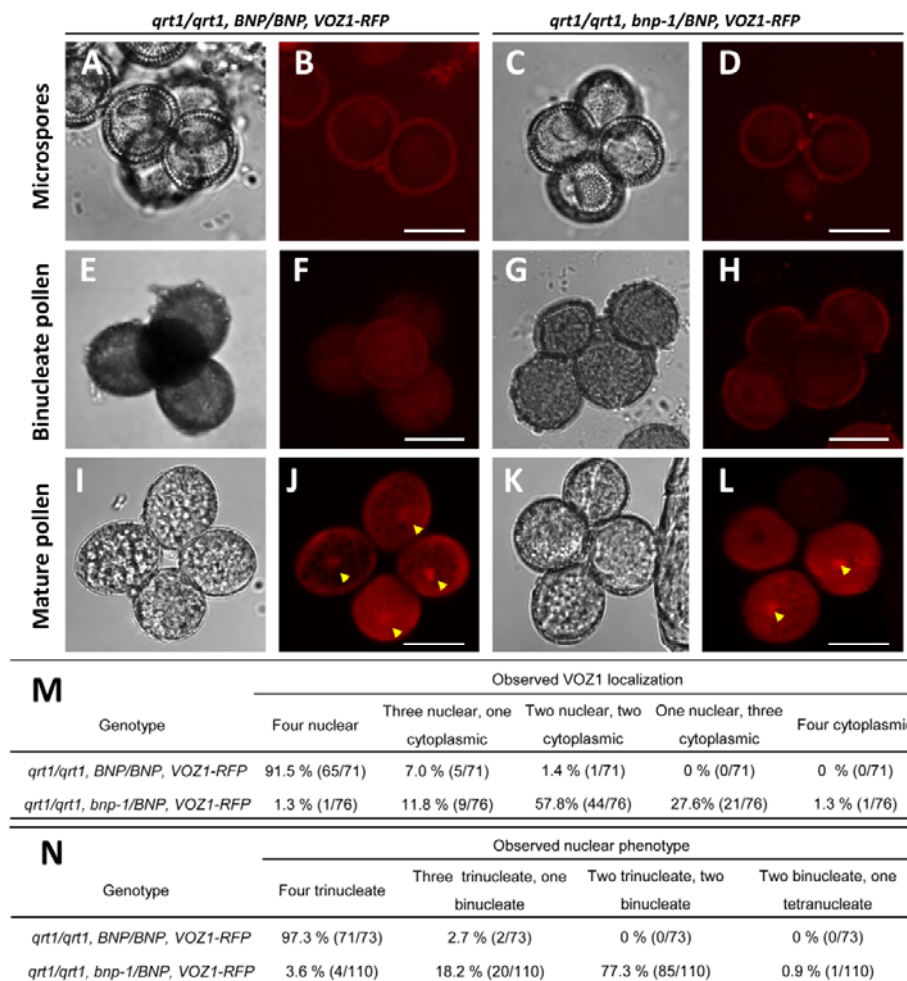

**Figure 6. Nuclear localization of VOZ1 is affected in *bnp* mutants.**

Pollen tetrads from *qrt1/qrt1, BNP/BNP, VOZ1-RFP* (A, B, E, F, I, J) and *qrt1/qrt1, bnp-1/BNP, VOZ1-RFP* (C, D, G, H, K, L) plants were analyzed at microspore (A-D), binucleate (E-H) and mature tricellular (I-L) stages. Representative z-stack images of confocal micrographs displaying VOZ1-RFP fluorescence (B, D, F, H, J, L) and bright field images (A, C, E, G, I, K) are shown. Arrowheads indicate nuclear localized VOZ1. Bars = 10  $\mu$ m.

Mature pollen tetrads from four *qrt1/qrt1, BNP/BNP, VOZ1-RFP* and three *qrt1/qrt1, bnp-1/BNP, VOZ1-RFP* plants were analyzed by fluorescent microscopy and VOZ1 localization (M) and nuclear configuration (N) were scored. Observed number and total pollen tetrads are indicated in parenthesis.

334 We later analyzed BNP localization during pollen development using WT  
 335 plants harboring stable *BNP-GFP* and *VOZ1-RFP* constructs. We observed that  
 336 both, VOZ1 and BNP, localized in the cytoplasm at early developmental stages.  
 337 Contrasting VOZ1, no nuclear localization was recorded for BNP (Fig. S9).  
 338 Partial co-localization was detected in areas in the cytosol where BNP and VOZ1  
 339 might interact at microspore and bicellular stages. This was not observed in  
 340 mature pollen, where VOZ1 show both nuclear and cytoplasmic localization. As  
 341 BNP remained in the cytosol at every developmental stage, forming speckles  
 342 during binucleate and mature pollen stages, any role related to VOZ proteins

343 translocation/function would be carried out outside the nucleus and before  
344 pollen maturation.

345

346

347

## 348 **DISCUSSION**

349 In this study we identified *BNP*, a gene coding for a DC1 domain protein that is  
350 required for pollen development and germination. Analysis of hemizygous  
351 *bnp/BNP* plants showed that transmission through the male gametophyte is  
352 severely impaired; about half of pollen grains from *bnp/BNP* plants resulted  
353 arrested at PMII stage and their germination was significantly reduced.

354 By means of Y2H and BiFC experiments, we identified and confirmed  
355 VOZ1 and VOZ2 as BNP interacting proteins. VOZ1 and VOZ2 are transcription  
356 factors that belong to the NAC transcription factor family, and were reported as  
357 involved in the control of flowering time (Celesnik et al., 2013; Yasui and  
358 Kohchi, 2014), either through the binding of PhyB (Yasui et al., 2012), Flowering  
359 Locus C (Mimida et al., 2011) or Constans (Koguchi et al., 2017; Kumar et al.,  
360 2018). VOZ proteins were also related to biotic and abiotic stress responses  
361 (Nakai et al., 2013; Song et al., 2018; Schwarzenbacher et al., 2020; Wang et  
362 al., 2021). VOZ1 and VOZ2 were proved to be functionally redundant, as single  
363 mutants for each gene showed normal phenotypes, but *voz1voz2* double  
364 mutants displayed phenotypic defects (Yasui et al., 2012; Celesnik et al., 2013;  
365 Nakai et al., 2013; Kumar et al., 2018). Interestingly, these plants presented the  
366 same pollen developmental defect observed in *bnp/BNP* plants, as a fraction of  
367 *voz1voz2* pollen grains contained only two nuclei –the vegetative nucleus and a  
368 single reproductive nucleus (Celesnik et al., 2013). This fact supports a  
369 physiological role for the interaction between BNP and VOZ proteins during  
370 pollen development.

371 BNP was localized mainly to PVC, in Rha1 positive vesicles. VOZ  
372 proteins are functional in the nucleus, but they were initially identified in  
373 cytoplasmic speckles and a cytoplasmic-nuclear translocation was proposed to  
374 modulate VOZ activity as transcriptional regulators (Yasui et al., 2012; Koguchi  
375 et al., 2017). VOZ1 and VOZ2 do not contain neither a transmembrane region  
376 nor localization signals such as NLS or NES (Jensen et al., 2010). This  
377 suggests that VOZ1 and VOZ2 nuclear/cytoplasmic localization must rely on  
378 another mechanism. Endocytic proteins have been previously shown to  
379 participate in the spatiotemporal regulation of transcription factors (Palfy et al.,  
380 2012; Wu et al., 2012; Serrano et al., 2016). They may facilitate the assembly of  
381 multi-molecular complexes through protein–protein interaction domains and act

382 as regulators (Pyrzynska et al., 2009). As can be concluded from the analysis  
383 showed in Fig. 6 and Table 3 a similar situation could be taking place between  
384 the pairs BNP-VOZ1, where BNP is required for VOZ1 nuclear localization.  
385 Implications of VOZ1/2 nuclear translocation may be related to VOZ1/2 role as  
386 a transcriptional regulator, as it was proposed to be exerted in the nucleus  
387 (Yasui et al., 2012). Interestingly, VOZ proteins nuclear localization was rarely  
388 detected, and the addition of NLS signals was usually required to place it the  
389 nucleus (Yasui et al., 2012).(Schwarzenbacher et al., 2020) However it was  
390 reported that degradation of VOZ1/2 takes also place in the nucleus, facilitated  
391 by the E3 ubiquitin ligase BRUTUS (Selote et al., 2018). Thus, BNP role could  
392 be involved in the function and/or in the degradation of VOZ1/2.

393 Our results also indicated that BNP could be essential not only during  
394 pollen development but also at additional developmental stages, such as  
395 germination and early stages of sporophyte development. In agreement with  
396 this, *BNP* expression was detected very early during seedling development, in  
397 particular in vascular tissues (Fig. 3). The expression pattern of BNP also  
398 suggests that it could play roles in other sporophytic tissues, either through the  
399 interaction with VOZ TFs, that are also ubiquitously expressed through the plant  
400 (Yasui et al., 2012), or through the interaction with other proteins. Potential BNP  
401 interacting proteins identified by Y2H experiments (Supplemental Table S2)  
402 provide a promising list of candidates that might be involved with BNP function  
403 in other plant tissues.

404 Only one additional DC1 domain protein, VLG, has been characterized  
405 so far and was likewise proved to be required for pollen development. However,  
406 *VLG* deficiency caused microgametogenesis arrest at PMI, an earlier stage,  
407 yielding unviable uninucleate pollen grains (D'Ippólito et al., 2017). On the other  
408 hand, VLG was also essential for female gametogenesis (D'Ippólito et al.,  
409 2017).

410 Notably, the Arabidopsis genome encodes for over 140 uncharacterized  
411 proteins harboring DC1 domains. Multiple sequence alignments of DC1 domain  
412 proteins from different species showed amino acid conservation restricted to the  
413 residues that define the DC1 signature motif, but divergence in the amino acids  
414 corresponding to the folded domain -which might define binding capabilities  
415 (Rahman and Das, 2015)- suggesting a diversity of interactors. Thus, DC1

416 domain proteins emerge as a novel family of highly specialized modular scaffold  
417 proteins, capable to promote the recruiting of binding targets and affect their  
418 localization and functionality.

419 Altogether, our results support a role for BNP acting as a scaffold protein  
420 recruiting VOZ1 and VOZ2 to prevacuolar compartments. This recruitment  
421 appears to facilitate VOZ1 -and likely VOZ2- translocation to the nucleus,  
422 promoting their activity as transcriptional regulators during pollen development.  
423 In addition, a role of BNP in the regulation of the levels VOZ proteins could not  
424 be discarded, as lower levels of these proteins were present in mature pollen  
425 lacking a functional BNP.

426

## 427 **MATERIALS AND METHODS**

### 428 **Plant materials and growth conditions**

429 Arabidopsis (Columbia [Col-0] ecotype) lines SALK\_114889 (*bnp-1*, with T-DNA  
430 insertion located in chr2 TAIR10 18,323,075) and GK-008E01 (*bnp-2*, with T-  
431 DNA insertion located in chr2 TAIR10 18,323,371) were obtained from ABRC  
432 (Ohio State University, Ohio, USA) (Alonso et al., 2003). Both lines were  
433 backcrossed twice to the WT Columbia prior to their use. Single insertion in  
434 At2g44370 after backcrosses and all genotypes were confirmed by PCR-based  
435 genotyping and segregation analysis. When indicated seeds were sterilized in  
436 20% (v/v) sodium hypochlorite, washed with sterile water and plated on MS  
437 plates with 50 µg/mL kanamycin or 7.5 µg/mL sulfadiazine, stratified at 4°C for  
438 48 h and placed at 23°C, 16 h light, 8 h dark. Resistant seedlings were then  
439 transferred onto soil and grown under the conditions described above.

440

### 441 **Molecular characterization of insertional lines**

442 For *bnp-1*, the left border–genomic sequence junction was determined by PCR  
443 in plants showing kanamycin resistance using the T-DNA-specific primer LBb1  
444 combined with the genomic sequence specific primers *bnp-1* RP and *bnp-1* LP  
445 (Table S1). For *bnp-2*, the left border–genomic sequence junction was  
446 determined by PCR in plants showing sulfadiazine resistance using the T-DNA–  
447 specific primer GKGT8474 combined with the genomic sequence specific  
448 primers *bnp-2* RP and *bnp-2* LP (Table S1).

449

450 **Segregation Analysis**

451 For self-cross analysis, the progeny of self-pollinated hemizygous plants was  
452 germinated on selective growth medium containing 50 µg/mL kanamycin for  
453 *bnp-1* or 7.5 µg/mL sulfadiazine for *bnp-2*, and the ratio of resistant to sensitive  
454 plants was scored. Reciprocal crosses were performed as described previously  
455 (Pagnussat et al., 2005).

456

457 **Constructions**

458 Genomic DNA was extracted from rosette leaves or whole seedlings as  
459 described (León et al., 2007). To generate *ProBNP:BNP-GFP* translational  
460 fusion the region including *BNP* ORF and putative promoter (672 upstream the  
461 ATG codon) was amplified by PCR using the primer combination listed in Table  
462 S1. The amplicon was cloned using pENTR<sup>TM</sup> Directional TOPO® Cloning Kit  
463 (Invitrogen) using Gateway® technology and the sequence was verified. The  
464 resulting plasmid *pENTR-ProBNP-BNP* was subjected to the LR reaction using  
465 the destination vector pMDC107 (Curtis and Grossniklaus, 2003). The  
466 *ProBNP:GUS* construct was generated amplifying the *BNP* putative promoter  
467 region (672 upstream the ATG codon) by PCR using the primer combination  
468 listed in Table S1. The amplicon was cloned into pENTR<sup>TM</sup>/TOPO (Invitrogen)  
469 and its sequence was verified. The resulting plasmid *pENTR-ProBNP* was  
470 subjected to the LR reaction using the destination vector pMDC162 (Curtis and  
471 Grossniklaus, 2003). For *Pro35S:BNP-GFP* construct, *BNP* ORF was PCR  
472 amplified using as template clone DKLAT2G44370 obtained from ABRC (Ohio  
473 State University, Ohio, USA) using the primer combination listed in Table S1.  
474 The amplicon was cloned into pENTR<sup>TM</sup>/TOPO (Invitrogen) and its sequence  
475 was verified. The resulting plasmid *pENTR-BNP* was subjected to the LR  
476 reaction using the destination vector pMDC83 (Curtis and Grossniklaus, 2003).  
477 For *ProUb10:VOZ1-RFP* and *ProUb10:VOZ2-RFP* constructions, respective  
478 ORFs were PCR amplified using primers listed in Table S1, cloned in  
479 pENTR<sup>TM</sup>/TOPO (Invitrogen) and sequence-verified. The resulting plasmids  
480 *pENTR-VOZ1* and *pENTR-VOZ2* were subjected to the LR reaction using the  
481 destination vector pUBN-RFP-DEST (Grefen et al., 2010).

482



### 483 **Obtaining *bnp/BNP* plants in the *qrt1* background**

484 To obtain *bnp* mutants in *qrt1* background, *bnp-1/BNP* was crossed with *qrt1*  
485 homozygous plants. Kan resistant plants from the progeny were selected and  
486 allowed to self-fertilize. Homozygous *qrt1* plants harboring *bnp* mutations were  
487 selected for further analysis (Johnson-Brousseau and McCormick, 2004).

488 In a similar way, *qrt1/qrt1-bnp-2/BNP-VOZ1-RFP* plants were obtained crossing  
489 *bnp-2/BNP* plants expressing VOZ1-RFP with *qrt1* homozygous plants.

490

### 491 **Transformation of *Agrobacterium tumefaciens* and *Arabidopsis***

492 Vectors were introduced into *Agrobacterium* strain GV3101 by electroporation.  
493 *Arabidopsis* WT plants were transformed using the floral dip method (Clough  
494 and Bent, 1998). Transformant plants were selected based on their ability to  
495 survive in MS medium with 15 mg. L<sup>-1</sup> hygromycin. Resistant (green seedlings  
496 with true leaves) were then transferred to soil and grown under the conditions  
497 described above.

498

### 499 **Morphological and histological analyses**

500 Pollen grains viability was assessed using Alexander's staining (Alexander,  
501 1969) and fluorescein diacetate (FDA) staining (Heslop-Harrison and Heslop-  
502 Harrison, 1970). For pollen development analysis, successive buds in the same  
503 inflorescence were collected (Lalanne and Twell, 2002), fixed in ethanol:acetic  
504 acid 3:1 until discoloration and stored at room temperature. Anthers were  
505 washed, dissected and mounted on microscopy slides with DAPI staining  
506 solution. For pollen tube germination, pollen grains were incubated overnight in  
507 a dark moisture chamber at 22°C in 0.01% boric acid, 5mM CaCl<sub>2</sub>, 5mM KCl, 1  
508 mM MgSO<sub>4</sub>, 10% sucrose pH 7.5 and 1.5% agarose, as described previously  
509 (Boavida and McCormick, 2007). For GUS staining, tissues from *ProBNP:GUS*  
510 carrying plants were collected and incubated in GUS staining solution as  
511 already described (Pagnussat et al., 2007). Gametophytes were observed on a  
512 Zeiss Axio Imager A2 microscope using DIC optics. Seedlings were observed  
513 on a Nikon SMZ800 Stereomicroscope and images were captured with a Canon  
514 DS126431 camera.

515

516 **Co-localization experiments in *Nicotiana benthamiana***

517 *A. tumefaciens* strain GV3101 carrying *Pro35S:BNP-GFP* was co-infiltrated with  
518 *A. tumefaciens* cells carrying either the late endosome marker *RFP-Rha1* or the  
519 Golgi apparatus marker *St-RFP*, in leaf epidermal cells of *N. benthamiana*  
520 plants. Infiltrated leaves were analyzed 48-72 h after infiltration on a confocal  
521 microscope (Nikon Eclipse C1 Plus) using EZ-C1 3.80 imaging software and Ti-  
522 Control. Pearson and Spearman correlation (PSC) plugin for ImageJ was used  
523 to calculate correlation coefficients from a minimum of 400 individual punctae  
524 from at least 10 independent cell images (French et al., 2008).

525

526 **Yeast two-hybrid screen**

527 The Y2H screening was performed by Hybrigenics Services S.A.S. (Paris,  
528 France). A DNA fragment encoding Arabidopsis At2g44370 (amino acids 1-250)  
529 was PCR-amplified and cloned into pB66 as C-terminal fusion to Gal4 DNA-  
530 binding domain (Gal4-At2g44370) and used as a bait to screen Universal  
531 Arabidopsis Normalized library containing 3.2 million of independent clones in  
532 pGADT7-RecAB vector. pB66 derive from the original pAS2ΔΔ (Fromont-  
533 Racine et al., 1997). For the Gal4 bait construct, 35 million clones were  
534 screened using a mating approach with YHGX13 (Y187 *ade2-101::loxP-kanMX-*  
535 *loxP*, *matα*) and L40ΔGal4 (*matα*) yeast strains as previously described  
536 (Fromont-Racine et al., 1997). 158 His<sup>+</sup> colonies were selected on a medium  
537 lacking tryptophan, leucine and histidine. The prey fragments of the positive  
538 clones were amplified by PCR and sequenced at their 5' and 3' junctions. The  
539 resulting sequences were used to identify the corresponding interacting proteins  
540 in the GenBank database (NCBI) using a fully automated procedure. A  
541 confidence score (PBS, for Predicted Biological Score) was attributed to each  
542 interaction as previously described (Formstecher et al., 2005).

543

544 **Bimolecular fluorescence complementation (BiFC) analysis**

545 The cDNA sequences of At2g44370 (*BNP*), At1g28520 (*VOZ1*), At2g42400  
546 (*VOZ2*) and At2g17740 (*VLG*) were PCR amplified using the primers listed in  
547 Table S1. The PCR products were cloned into pENTR<sup>TM</sup>/TOPO (Invitrogen),  
548 sequenced and recombined through BP reaction into BiFC destination plasmids  
549 pUBN-YN and pUBN-YC (Grefen et al., 2010). The binary plasmids were then

550 transformed into *A. tumefaciens* strain GV3101 by electroporation. Split nYFP-  
551 and cYFP-tagged protein pairs and the gene-silencing suppressor p19 were co-  
552 expressed in *N. benthamiana* leaves by *A. tumefaciens* -mediated inoculation.  
553 Plant leaves were examined 48-72 h post-infiltration with a confocal microscope  
554 (Nikon Eclipse C1 Plus) using a Super Fluor 40.0x/1.30/0.22 Oil objective,  
555 numerical aperture 1.300. Acquisition was performed using EZ-C1 3.80 imaging  
556 software and Ti-Control. All pictures were acquired with the same settings.

557

### 558 **Bioinformatics and phylogenetic analysis**

559 Sequences from the DC1 domain family were identified using the Basic Local  
560 Alignment Search Tool (BLAST) from NCBI (National Center for Biotechnology  
561 Information) using initially BNP as a reference and retrieved sequences in  
562 iterative searches. Protein sequences alignments were performed using  
563 MEGA7 (version 7.0.14) (Kumar et al., 2016). Phylogenetic trees were  
564 constructed using the neighbor-joining method and the default settings of  
565 MEGA7 (version 7.0.14) (Kumar et al., 2016). The evolutionary distances were  
566 computed using the Poisson correction method (Zuckerandl and Pauling,  
567 1965) and are in the units of the number of amino acid substitutions per site.  
568 The trees were drawn using FigTree (version 1.4.3) (<http://tree.bio.ed.ac.uk/>).  
569 Graphic display of identities was visualized using Geneious (version 9.1.4)  
570 (<http://www.geneious.com>) based on an identity matrix (Kearse et al., 2012).

### 571 **Accession Numbers**

572 Sequence data from this article can be found in the Arabidopsis Genome  
573 Initiative database under accession numbers: BNP (At2g44370), VOZ1  
574 (At1g28520), VOZ2 (At2g42400) and VLG (At2g17740).

575

### 576 **Supplemental Data**

577

578 **Supplemental Figure S1.** *bnp/BNP* hemizygous plants showed normal  
579 sporophytic phenotypes and seed sets.

580 **Supplemental Figure S2.** *bnp/BNP* hemizygous plants showed no differences  
581 in the viability of mature pollen.

582 **Supplemental Figure S3.** Complementation of *bnp-1/BNP* plants with  
583 *ProBNP:BNP-GFP*.

584 **Supplemental Figure S4.** *BNP* expression in Arabidopsis

585 **Supplemental Figure S5.** BNP-related protein VLG does not interact with  
586 VOZ1, VOZ2 or BNP.

587 **Supplemental Figure S6.** Analysis of co-localization of BNP and the endocytic  
588 tracer FM4-64

589 **Supplemental Figure S7.** Negative controls for co-localization experiments  
590 showing positive correlations

591 **Supplemental Figure S8.** BPN and VOZ1 localization during pollen  
592 development

593 **Supplemental Figure S9.** Quantification of VOZ1-RFP red fluorescence in  
594 mature pollen of *qrt1/qrt1*, *BNP/BNP*, *VOZ1-RFP* and *qrt1/qrt1*, *bnp-1/BNP*,  
595 *VOZ1-RFP* plants

596

597 **Supplemental Table S1.** Selected BNP interacting protein identified by a yeast  
598 two-hybrid screening.

599 **Supplemental Table S2.** Primers used in the study

600

## 601 **Acknowledgements**

602 We would like to thank Michael Blatt and Christopher Grefen (Glasgow  
603 University, UK) for providing pUB-Destination vectors, Jurgen Denecke  
604 (University of Leeds, UK) for providing the constructs ST-RFP and Rha-RFP,  
605 Nicolas Setzes for assistance with statistical analysis and Daniela Villamonte for  
606 technical assistance with confocal microscopy. This research was funded by  
607 grants to DFF from Agencia Nacional de Promoción Científica y Técnica  
608 Argentina (PICT2013-1524 and PICT2017-0232), Consejo Nacional de  
609 Investigaciones Científicas y Técnicas (CONICET, PIP-0200), Comisión de  
610 Investigaciones Científicas (CIC-PBA) and Universidad Nacional de Mar del  
611 Plata; a grant to GCP from the Howard Hughes Medical Institute (IECS award  
612 55007430). LAA and JF are fellows of CONICET; NLA is a fellow of ANPCyT;  
613 DFF, GCP, CAC and SD are researchers from CONICET.

## 614 Figure Legends

615 **Figure 1.** BNP codes for a DC1 domain containing protein. (A) Schematic view  
616 of a region of Arabidopsis chromosome 2 (from 18,323,538 to 18,321,537 bp -  
617 TAIR10) showing BNP genomic location and *bnp-1* and *bnp-2* insertion sites.  
618 (B) BNP amino acid sequence with boxed DC1 domains. (C) Phylogenic tree of  
619 140 DC1 domain containing proteins in Arabidopsis. Bootstrap test results  
620 (1000 replicates) of the major nodes are indicated. IDs of sequences grouped in  
621 clusters I to VIII are listed. (D) Alignment of BNP with its closest Arabidopsis  
622 homologs and CaDC1 (AEI52549), TaCHP (ACU80555), NtDC1a (BAF80452)  
623 and NtDC1b (BAF80453). Phylogenic tree with bootstrap test results (1000  
624 replicates) for the alignment of the complete 18 sequences is shown. Amino  
625 acid region represented for each sequence is indicated. DC1 domains are  
626 framed, signature residues and binding loop regions are indicated (C=Cys,  
627 H=His, — = loop). Higher intensity in grey scale denotes higher sequence  
628 similarity.

629

630 **Figure 2. Pollen development and germination is impaired in *bnp-1***  
631 **mutants.** (A) Quantification of phenotypes observed in *BNP/BNP* and *bnp-*  
632 *1/BNP* plants in *qrt1/qrt1* background. (B-E) Nuclear configuration types  
633 revealed by DAPI (4',6-Diamidino-2-phenylindole) staining. Bars = 10  $\mu$ m. (F)  
634 Quantification of pollen tube germination in tetrads from *BNP/BNP* and *bnp-*  
635 *1/BNP* plants in *qrt1/qrt1* background. (G-K) Pollen tube germination in tetrads.  
636 Bars = 20  $\mu$ m

637

638 **Figure 3. *BNP* is expressed in pollen and young sporophytic tissues.** (A-D)  
639 Confocal images showing BNP-GFP through microgametogenesis. (E-H)  
640 Overlay between DIC and GFP fluorescence. (A and E) Microspore tetrad, (B  
641 and F) released microspore, (C and G) bicellular stage and (D and H) tricellular  
642 stage. (I) Image showing a projection along the z axis of all planes showing  
643 GFP fluorescence. (J) Overlay of DIC and GFP fluorescence showing a  
644 germinating pollen grain. (K-S) GUS activity in Arabidopsis transgenic plants  
645 carrying the *pBNP:GUS* construct. (K) Seedling 24 h after imbibition, (L) 48 h

646 after imbibition, (M) 6 days post germination and (N) 12 days post germination.  
647 (O) Root with lateral root primordium, (P) primary root with root hairs, (Q) third  
648 leaf 8 days after imbibition (R) third leaf 14 days after imbibition. (S) GUS signal  
649 was detected inside anthers at floral developmental stage 10. Three  
650 independent transgenic lines were used for this study. Pictures are  
651 representative of the results obtained in all analyzed lines. Bars = 10  $\mu$ m.

652

653 **Figure 4. BNP interacts with itself, VOZ1 and VOZ2.** Bimolecular  
654 fluorescence complementation (BiFC) analysis of the interaction of BNP with  
655 itself, VOZ1 and VOZ2 in *Nicotiana benthamiana* leaves. Representative  
656 confocal microscopy images showing that BNP interacts with (A–C) itself, (D-F)  
657 VOZ1 and (G-I) VOZ2. Reconstituted YFP fluorescence (YFP) or DIC images of  
658 *N. benthamiana* leaves are shown in epidermal cells co-infiltrated with  
659 *Agrobacterium tumefaciens* harboring the indicated constructs. Control *N.*  
660 *benthamiana* leaves transfected with (J-L) BNP-N-YFP, (M-O) BNP-C-YFP, (P-  
661 R) VOZ1-C-YFP, (S-U) VOZ2-C-YFP do not show any BiFC signal. The last row  
662 (C, F, I, L, O, R, U) correspond to the magnification of regions of interest  
663 (insets) indicated in the first row. Bars = 20  $\mu$ m.

664 **Figure 5. BNP co-localizes with VOZ1 and VOZ2 to prevacuolar**  
665 **compartments.** (A, F, K and P) Localization of BNP-GFP transiently expressed  
666 in *Nicotiana benthamiana* epidermal cells. (B) Fluorescent marker for  
667 prevacuolar compartments, RFP-Rha1. (C) Merged image of BNP-GFP and  
668 RFP-Rha1. (D) Shows an overlay with the corresponding bright-field image. (E,  
669 J, O and T) Pearson and Spearman correlation (PSC) test calculated using a  
670 plugin for ImageJ; r values indicate the level of co-localization ranging from +1  
671 for perfect co-localization to -1 for negative correlation. (G) Fluorescent marker  
672 for Golgi apparatus, St-RFP. (H) Merged image of BNP-GFP and St-RFP. (I)  
673 Shows an overlay with the corresponding bright-field image. (L) Localization of  
674 RFP-VOZ1. (M) Merged image of BNP-GFP and RFP-VOZ1. (N) Shows the  
675 corresponding bright field image of the cells showed in (M). (Q) Localization of  
676 RFP-VOZ2. (R) Merged image of BNP-GFP and RFP-VOZ2. (S) Bright field  
677 image of the cells showed in (R). Bars = 20  $\mu$ m.

678



679 **Figure 6. Nuclear localization of VOZ1 is affected in *bnp* mutants.**

680 Pollen tetrads from *qrt1/qrt1*, *BNP/BNP*, *VOZ1-RFP* (A, B, E, F, I, J) and  
681 *qrt1/qrt1*, *bnp-1/BNP*, *VOZ1-RFP* (C, D, G, H, K, L) plants were analyzed at  
682 microspore (A-D), binucleate (E-H) and mature tricellular (I-L) stages.  
683 Representative z-stack images of confocal micrographs displaying VOZ1-RFP  
684 fluorescence (B, D, F, H, J, L) and bright field images (A, C, E, G, I, K) are  
685 shown. Arrowheads indicate nuclear localized VOZ1. Bars = 10  $\mu$ m.

686 Mature pollen tetrads from four *qrt1/qrt1*, *BNP/BNP*, *VOZ1-RFP* and three  
687 *qrt1/qrt1*, *bnp-1/BNP*, *VOZ1-RFP* plants were analyzed by fluorescent  
688 microscopy and VOZ1 localization (M) and nuclear configuration (N) were  
689 scored. Observed number and total pollen tetrads are indicated in parenthesis.

690

**Table 1. Transmission efficiency of *bnp* alleles.** Transmission efficiency of the *bnp-1* and *bnp-2* alleles in reciprocal crosses between mutant and WT plants.

| Parental genotypes |                  | Genotype of progeny† |                  | Transmission efficiency of: | p-value* |
|--------------------|------------------|----------------------|------------------|-----------------------------|----------|
| Female             | Male             | WT                   | <i>bnp-1/BNP</i> | <i>bnp-1</i>                |          |
| <i>bnp-1/BNP</i>   | WT               | 98                   | 89               | ♀ 90.8%                     | 0.51     |
| WT                 | <i>bnp-1/BNP</i> | 181                  | 28               | ♂ 15.5%                     | <0.0001  |
|                    |                  | WT                   | <i>bnp-2/BNP</i> | <i>bnp-2</i>                |          |
| <i>bnp-2/BNP</i>   | WT               | 217                  | 208              | ♀ 95.9%                     | 0.66     |
| WT                 | <i>bnp-2/BNP</i> | 254                  | 56               | ♂ 22%                       | <0.0001  |

†No homozygous plants were detected; \* Chi-square test for a 1:1 segregation hypothesis (degrees of freedom = 1).

**Table 2. Viability of the progeny in *bnp* mutants.** Seed germination and seedling lethality of the progeny of self-pollinated *bnp-1/BNP*, *bnp-2/BNP* and WT plants.

| Parental genotype | % viable progeny | % unviable progeny |                    | p-value* |
|-------------------|------------------|--------------------|--------------------|----------|
|                   |                  | not germinated     | seedling lethality |          |
| WT                | 98.86 (435/440)  | 0.23 (435/440)     | 1.13 (435/440)     |          |
| <i>bnp-1/BNP</i>  | 94.83 (715/754)  | 1.72 (13/754)      | 3.45 (26/754)      | <0.001   |
| <i>bnp-2/BNP</i>  | 93.32 (908/753)  | 2.15 (21/753)      | 4.52 (44/753)      | <0.00001 |

In parenthesis, number of individuals observed over the total analyzed. \* Chi-square test for a hypothesis of no relationship between the genotype of the parents and the viability of the progeny (degree of freedom = 1).

## Parsed Citations

**Alexander MP (1969) Differential Staining of Aborted and Nonaborted Pollen. Stain Technol 44: 117-122**

Google Scholar: [Author Only](#) [Title Only](#) [Author and Title](#)

**Alonso JM, Stepanova AN, Leisse TJ, Kim CJ, Chen H, Shinn P, Stevenson DK, Zimmerman J, Barajas P, Cheuk R, et al (2003) Genome-wide insertional mutagenesis of Arabidopsis thaliana. Science 301: 653–657**

Google Scholar: [Author Only](#) [Title Only](#) [Author and Title](#)

**Bhaskar RV, Mohanty B, Verma V, Wijaya E, Kumar PP (2015) A hormone-responsive C1-domain-containing protein At5g17960 mediates stress response in Arabidopsis thaliana. PLoS ONE 10: e0115418**

Google Scholar: [Author Only](#) [Title Only](#) [Author and Title](#)

**Boavida LC, McCormick S (2007) Temperature as a determinant factor for increased and reproducible in vitro pollen germination in Arabidopsis thaliana. Plant J 52: 570-582**

Google Scholar: [Author Only](#) [Title Only](#) [Author and Title](#)

**Bolte S, Talbot C, Boutte Y, Catrice O, Read ND, Satiat-Jeunemaitre B (2004) FM-dyes as experimental probes for dissecting vesicle trafficking in living plant cells. J Microsc 214: 159-173**

Google Scholar: [Author Only](#) [Title Only](#) [Author and Title](#)

**Borg M, Brownfield L, Twell D (2009) Male gametophyte development: A molecular perspective. J Exp Bot 60: 1465-1478**

Google Scholar: [Author Only](#) [Title Only](#) [Author and Title](#)

**Celesnik H, Ali GS, Robison FM, Reddy AS (2013) Arabidopsis thaliana VOZ (Vascular plant One-Zinc finger) transcription factors are required for proper regulation of flowering time. Biol Open 2: 424-431**

Google Scholar: [Author Only](#) [Title Only](#) [Author and Title](#)

**Clough SJ, Bent AF (1998) Floral dip: a simplified method for Agrobacterium-mediated transformation of Arabidopsis thaliana. Plant J 16: 735-743**

Google Scholar: [Author Only](#) [Title Only](#) [Author and Title](#)

**Colon-Gonzalez F, Kazanietz MG (2006) C1 domains exposed: from diacylglycerol binding to protein-protein interactions. Biochim Biophys Acta 1761: 827-837**

Google Scholar: [Author Only](#) [Title Only](#) [Author and Title](#)

**Curtis MD, Grossniklaus U (2003) A gateway cloning vector set for high-throughput functional analysis of genes in planta. Plant Physiol 133: 462–469.**

Google Scholar: [Author Only](#) [Title Only](#) [Author and Title](#)

**D'Ippólito S, Arias LA, Casalongué CA, Pagnussat GC, Fiol DF (2017) The DC1-domain protein VACUOLELESS GAMETOPHYTES is essential for female and male gametophyte development in Arabidopsis. Plant J 90: 261-275**

Google Scholar: [Author Only](#) [Title Only](#) [Author and Title](#)

**Escobar-Sepúlveda HF, Trejo-Télez LI, Pérez-Rodríguez P, Hidalgo-Contreras JV, Gómez-Merino FC (2017) Diacylglycerol kinases are widespread in higher plants and display inducible gene expression in response to beneficial elements, metal, and metalloid ions. Front Plant Sci 8: 129**

Google Scholar: [Author Only](#) [Title Only](#) [Author and Title](#)

**Foresti O, Gershlick DC, Bottanelli F, Hummel E, Hawes C, Denecke J (2010) A recycling-defective vacuolar sorting receptor reveals an intermediate compartment situated between prevacuoles and vacuoles in tobacco. Plant Cell 22: 3992-4008**

Google Scholar: [Author Only](#) [Title Only](#) [Author and Title](#)

**Formstecher E, Aresta S, Collura V, Hamburger A, Meil A, Trehin A, Reverdy C, Betin V, Maire S, Brun C, Jacq B, Arpin M, Bellaiche Y, Bellusci S, Benaroch P, Bornens M, Chanut R, Chavrier P, Delattre O, Doye V, Fehon R, Faye G, Galli T, Girault JA, Goud B, de Gunzburg J, Johannes L, Junier MP, Mirouse V, Mukherjee A, Papadopoulou D, Perez F, Plessis A, Rosse C, Saule S, Stoppa-Lyonnet D, Vincent A, White M, Legrain P, Wojcik J, Camonis J, Daviet L (2005) Protein interaction mapping: a Drosophila case study. Genome Res 15: 376-384**

Google Scholar: [Author Only](#) [Title Only](#) [Author and Title](#)

**Francis KE, Lam SY, Copenhaver GP (2006) Separation of Arabidopsis pollen tetrads is regulated by QUARTET1, a pectin methyltransferase gene. Plant Physiol 142: 1004-1013**

Google Scholar: [Author Only](#) [Title Only](#) [Author and Title](#)

**French AP, Mills S, Swarup R, Bennett MJ, Pridmore TP (2008) Colocalization of fluorescent markers in confocal microscope images of plant cells. Nat Protoc 3: 619-628**

Google Scholar: [Author Only](#) [Title Only](#) [Author and Title](#)

**Fromont-Racine M, Rain JC, Legrain P (1997) Toward a functional analysis of the yeast genome through exhaustive two-hybrid screens. Nat Genet 16: 277-282**

Google Scholar: [Author Only](#) [Title Only](#) [Author and Title](#)

**Gao S, Yang L, Zeng HQ, Zhou ZS, Yang ZM, Li H, Sun D, Xie F, Zhang B (2016) A cotton miRNA is involved in regulation of plant response to salt stress. Sci Reports 6: 19736**

Google Scholar: [Author Only](#) [Title Only](#) [Author and Title](#)

**Grefen C, Donald N, Hashimoto K, Kudla J, Schumacher K, Blatt MR (2010) A ubiquitin-10 promoter-based vector set for fluorescent protein tagging facilitates temporal stability and native protein distribution in transient and stable expression studies. Plant J 64: 355-365**

Google Scholar: [Author Only](#) [Title Only](#) [Author and Title](#)

**Hafidh S, Fila J, Honys D (2016) Male gametophyte development and function in angiosperms: a general concept. Plant Reprod 29: 31-51**

Google Scholar: [Author Only](#) [Title Only](#) [Author and Title](#)

**Heslop-Harrison J, Heslop-Harrison Y (1970) Evaluation of pollen viability by enzymatically induced fluorescence; intracellular hydrolysis of fluorescein diacetate. Stain Technol 45: 115-120**

Google Scholar: [Author Only](#) [Title Only](#) [Author and Title](#)

**Hwang IS, Choi DS, Kim NH, Kim DS, Hwang BK (2014) The pepper cysteine/histidine-rich DC1 domain protein CaDC1 binds both RNA and DNA and is required for plant cell death and defense response. New Phytol 201: 518-530**

Google Scholar: [Author Only](#) [Title Only](#) [Author and Title](#)

**Jensen Michael K, Kjaersgaard T, Nielsen Michael M, Galberg P, Petersen K, O'Shea C, Skriver K (2010) The Arabidopsis thaliana NAC transcription factor family: structure–function relationships and determinants of ANAC019 stress signalling. Biochem J 426: 183-196**

Google Scholar: [Author Only](#) [Title Only](#) [Author and Title](#)

**Johnson-Brousseau SA, McCormick S (2004) A compendium of methods useful for characterizing Arabidopsis pollen mutants and gametophytically-expressed genes. Plant J 39: 761-775**

Google Scholar: [Author Only](#) [Title Only](#) [Author and Title](#)

**Kearse M, Moir R, Wilson A, Stones-Havas S, Cheung M, Sturrock S, Buxton S, Cooper A, Markowitz S, Duran C, Thierer T, Ashton B, Meintjes P, Drummond A (2012) Geneious Basic: an integrated and extendable desktop software platform for the organization and analysis of sequence data. Bioinformatics 28: 1647-1649**

Google Scholar: [Author Only](#) [Title Only](#) [Author and Title](#)

**Koguchi M, Yamasaki K, Hirano T, Sato MH (2017) Vascular plant one-zinc-finger protein 2 is localized both to the nucleus and stress granules under heat stress in Arabidopsis. Plant Signal Behav 12: e1295907**

Google Scholar: [Author Only](#) [Title Only](#) [Author and Title](#)

**Kumar S, Choudhary P, Gupta M, Nath U (2018) VASCULAR PLANT ONE-ZINC FINGER1 (VOZ1) and VOZ2 Interact with CONSTANS and promote photoperiodic flowering transition. Plant Physiol 176: 2917-2930**

Google Scholar: [Author Only](#) [Title Only](#) [Author and Title](#)

**Kumar S, Stecher G, Tamura K (2016) MEGA7: molecular evolutionary genetics analysis version 7.0 for bigger datasets. Mol Biol Evol 33: 1870-1874**

Google Scholar: [Author Only](#) [Title Only](#) [Author and Title](#)

**Lalanne E, Twell D (2002) Genetic control of male germ unit organization in Arabidopsis. Plant Physiol 129: 865-875**

Google Scholar: [Author Only](#) [Title Only](#) [Author and Title](#)

**León G, Holuigue L, Jordana X (2007) Mitochondrial Complex II is essential for gametophyte development in Arabidopsis. Plant Physiol 143: 1534-1546**

Google Scholar: [Author Only](#) [Title Only](#) [Author and Title](#)

**Li C, Lv J, Zhao X, Ai X, Zhu X, Wang M, Zhao S, Xia G (2010) TaCHP: A wheat zinc finger protein gene down-regulated by abscisic acid and salinity stress plays a positive role in stress tolerance. Plant Physiol 154: 211-221**

Google Scholar: [Author Only](#) [Title Only](#) [Author and Title](#)

**Mimida N, Kidou S, Iwanami H, Moriya S, Abe K, Voogd C, Varkonyi-Gasic E, Kotoda N (2011) Apple FLOWERING LOCUS T proteins interact with transcription factors implicated in cell growth and organ development. Tree Physiol 31: 555-566**

Google Scholar: [Author Only](#) [Title Only](#) [Author and Title](#)

**Mitsuda N, Hisabori T, Takeyasu K, Sato MH (2004) VOZ: isolation and characterization of novel vascular plant transcription factors with a one-zinc finger from Arabidopsis thaliana. Plant Cell Physiol 45: 845-854**

Google Scholar: [Author Only](#) [Title Only](#) [Author and Title](#)

**Nakai Y, Nakahira Y, Sumida H, Takebayashi K, Nagasawa Y, Yamasaki K, Akiyama M, Ohme-Takagi M, Fujiwara S, Shiina T, Mitsuda N, Fukusaki E, Kubo Y, Sato MH (2013) Vascular plant one-zinc-finger protein 1/2 transcription factors regulate abiotic and biotic stress responses in Arabidopsis. Plant J 73: 761-775**

Google Scholar: [Author Only](#) [Title Only](#) [Author and Title](#)

**Pagnussat GC, Yu HJ, Ngo QA, Rajani S, Mayalagu S, Johnson CS, Capron A, Xie LF, Ye D, Sundaresan V (2005) Genetic and molecular identification of genes required for female gametophyte development and function in Arabidopsis. Development 132: 603-614**

Google Scholar: [Author Only](#) [Title Only](#) [Author and Title](#)

**Pagnussat GC, Yu HJ, Sundaresan V (2007) Cell-fate switch of synergid to egg cell in Arabidopsis eostre mutant embryo sacs arises from misexpression of the BEL1-like homeodomain gene BLH1. Plant Cell 19: 3578-3592**

Google Scholar: [Author Only](#) [Title Only](#) [Author and Title](#)

**Palfy M, Remenyi A, Korcsmaros T (2012) Endosomal crosstalk: meeting points for signaling pathways. Trends Cell Biol 22: 447-456**

Google Scholar: [Author Only](#) [Title Only](#) [Author and Title](#)

**Pyrzynska B, Pilecka I, Miaczynska M (2009) Endocytic proteins in the regulation of nuclear signaling, transcription and tumorigenesis. Mol Oncol 3: 321-338**

Google Scholar: [Author Only](#) [Title Only](#) [Author and Title](#)

**Rahman GM, Das J (2015) Modeling studies on the structural determinants for the DAG/phorbol ester binding to C1 domain. J Biomol Struct Dyn 33: 219-232**

Google Scholar: [Author Only](#) [Title Only](#) [Author and Title](#)

**Schwarzenbacher RE, Wardell G, Stassen J, Guest E, Zhang P, Luna E, Ton J (2020) The IBI1 receptor of  $\beta$ -aminobutyric acid interacts with VOZ transcription factors to regulate abscisic acid signaling and callose-associated defense. Molecular Plant 13: 1455-1469**

Google Scholar: [Author Only](#) [Title Only](#) [Author and Title](#)

**Selote D, Matthiadis A, Gillikin JW, Sato MH, Long TA (2018) The E3 ligase BRUTUS facilitates degradation of VOZ1/2 transcription factors. Plant Cell Environ 41: 2463-2474**

Google Scholar: [Author Only](#) [Title Only](#) [Author and Title](#)

**Serrano I, Buscaill P, Audran C, Pouzet C, Jauneau A, Rivas S (2016) A non canonical subtilase attenuates the transcriptional activation of defence responses in Arabidopsis thaliana. Elife 5**

Google Scholar: [Author Only](#) [Title Only](#) [Author and Title](#)

**Shinya T, Galis I, Narisawa T, Sasaki M, Fukuda H, Matsuoka H, Saito M, Matsuoka K (2007) Comprehensive analysis of glucan elicitor-regulated gene expression in tobacco BY-2 cells reveals a novel MYB transcription factor involved in the regulation of phenylpropanoid metabolism. Plant Cell Physiol 48: 1404-1413**

Google Scholar: [Author Only](#) [Title Only](#) [Author and Title](#)

**Song C, Lee J, Kim T, Hong JC, Lim CO (2018) VOZ1, a transcriptional repressor of DREB2C, mediates heat stress responses in Arabidopsis. Planta 247: 1439-1448**

Google Scholar: [Author Only](#) [Title Only](#) [Author and Title](#)

**Suesslin C, Frohnmeyer H (2003) An Arabidopsis mutant defective in UV-B light-mediated responses. Plant J 33: 591-601**

Google Scholar: [Author Only](#) [Title Only](#) [Author and Title](#)

**Twell D (2011) Male gametogenesis and germline specification in flowering plants. Sex Plant Reprod 24: 149-160**

Google Scholar: [Author Only](#) [Title Only](#) [Author and Title](#)

**Wang J, Wang R, Fang H, Zhang C, Zhang F, Hao Z, You X, Shi X, Park CH, Hua K, He F, Bellizzi M, Xuan Vo KT, Jeon J-S, Ning Y, Wang G-L (2021) Two VOZ transcription factors link an E3 ligase and an NLR immune receptor to modulate immunity in rice. Molecular Plant 14: 253-266**

Google Scholar: [Author Only](#) [Title Only](#) [Author and Title](#)

**Wee EG-T, Sherrier DJ, Prime TA, Dupree P (1998) Targeting of active sialyltransferase to the plant golgi apparatus. Plant Cell 10: 1759-1768**

Google Scholar: [Author Only](#) [Title Only](#) [Author and Title](#)

**Wu P, Wee P, Jiang J, Chen X, Wang Z (2012) Differential regulation of transcription factors by location-specific EGF receptor signaling via a spatio-temporal interplay of ERK activation. PLoS One 7: e41354**

Google Scholar: [Author Only](#) [Title Only](#) [Author and Title](#)

**Yasui Y, Kohchi T (2014) VASCULAR PLANT ONE-ZINC FINGER1 and VOZ2 repress the FLOWERING LOCUS C clade members to control flowering time in Arabidopsis. Biosci Biotechnol Biochem 78: 1850-1855**

Google Scholar: [Author Only](#) [Title Only](#) [Author and Title](#)

**Yasui Y, Mukougawa K, Uemoto M, Yokofuji A, Suzuri R, Nishitani A, Kohchi T (2012) The phytochrome-interacting vascular plant one-zinc finger1 and VOZ2 redundantly regulate flowering in Arabidopsis. Plant Cell 24: 3248-3263**

Google Scholar: [Author Only](#) [Title Only](#) [Author and Title](#)

bioRxiv preprint doi: <https://doi.org/10.1101/2022.03.17.484815>; this version posted March 20, 2022. The copyright holder for this preprint (which was not certified by peer review) is the author/funder, who has granted bioRxiv a license to display the preprint in perpetuity. It is made available under a [CC-BY-NC 4.0 International license](#).

**Zuckerklund E, Pauling L (1965) Evolutionary divergence and convergence in proteins. *Evolving genes and proteins* 97: 97-166**

Google Scholar: [Author Only](#) [Title Only](#) [Author and Title](#)
